# Supplementary material for: Prevalence of Clinical Signs and Symptoms of Temporomandibular Joint Disorders Registered in the EUROTMJ Database: A Prospective Study in a Portuguese Center
Source: Preprints.org preprint supplement (doi:10.20944/preprints202305.0580.v1), 2023-05-09
Supplement: Supplementary file 1 [file supplementary]

**Table S1.** Relative frequency (%) of the TMJ pain and clinical variables (open mouth limitation, clicks, crepitus and arthralgia) with demographic data, parafunctional habits, risk factors and other comorbidities. F – female; Male. Significant values are in bold.

|  | TMJ Pain | | | | Open Mouth Limitation | | Myalgia Degree | | | | TMJ Clicks | | TMJ Crepitus | | Arthralgia | |
| --- | --- | --- | --- | --- | --- | --- | --- | --- | --- | --- | --- | --- | --- | --- | --- | --- |
| No | Mild | Moderate | Severe | No | Yes | 0 | 1 | 2 | 3 | No | Yes | No | Yes | No | Yes |
| **Relative Frequency (%)** | | | | | | | | | | | | | | | |
|  | **Demographic Data** | | | | | | | | | | | | | | | |
| **Sex** |  |  |  |  |  |  |  |  |  |  |  |  |  |  |  |  |
| F | **14.0** | **34.0** | **36.7** | **15.2** | **28.5** | **71.5** | **11.1** | **10.8** | **34.0** | **44.1** | 14.4 | 85.6 | 77.3 | 22.8 | 49.8 | 50.2 |
| M | **27.6** | **40.5** | **26.7** | **5.2** | **46.6** | **53.4** | **29.0** | **21.0** | **33.0** | **17.0** | 13.0 | 87.0 | 83.5 | 16.5 | 57.8 | 42.2 |
| **Age** |  |  |  |  |  |  |  |  |  |  |  |  |  |  |  |  |
| <18 | 13.2 | 39.5 | 39.5 | 7.9 | 31.6 | 68.4 | 14.3 | 11.4 | 34.3 | 40 | **5.3** | **94.7** | **87.5** | **12.5** | **35.1** | **64.9** |
| 18-30 | 16.7 | 34.4 | 35.9 | 13.0 | 27.6 | 72.4 | 14.9 | 16.7 | z33.9 | 34.5 | **7.9** | **92.1** | **84.9** | **15.1** | **52.8** | **47.2** |
| 31-45 | 18.7 | 35.7 | 30.8 | 14.8 | 33.5 | 66.5 | 12.7 | 10.8 | 39.5 | 36.9 | **14.3** | **85.7** | **80.9** | **19.1** | **50.0** | **50.0** |
| 46-60 | 13.7 | 39.3 | 34.2 | 12.8 | 33.6 | 66.4 | 14.1 | 12.1 | 31.3 | 42.4 | **22.3** | **77.7** | **73.7** | **26.3** | **61.5** | **38.5** |
| >60 | 18.2 | 27.3 | 40.9 | 13.3 | 37.9 | 62.1 | 19.6 | 8.9 | 21.4 | 50.0 | **21.9** | **78.1** | **53.8** | **46.2** | **41.2** | **58.8** |
|  | **Parafunctional Habits** | | | | | | | | | | | | | | | |
| **Clenching** |  |  |  |  |  |  |  |  |  |  |  |  |  |  |  |  |
| No | 15.7 | 42.1 | 34.0 | 8.2 | 34.6 | 65.4 | **21.0** | **14.5** | **29.0** | **35.5** | 14.7 | 85.3 | 80.2 | 19.8 | 51.8 | 48.2 |
| Yes | 13.4 | 35.4 | 38.2 | 13.1 | 30.4 | 69.6 | **9.9** | **12.3** | **35.7** | **42.0** | 13.7 | 86.3 | 78.4 | 21.6 | 48.9 | 51.1 |
| **Bruxism** |  |  |  |  |  |  |  |  |  |  |  |  |  |  |  |  |
| No | **14.6** | **44.3** | **31.6** | **9.4** | 30.0 | 70.0 | **16.6** | **16.1** | **30.6** | **36.8** | 14.8 | 85.2 | 80.5 | 19.5 | 52.1 | 47.9 |
| Yes | **12.8** | **32.2** | **39.4** | **15.6** | 31.6 | 68.4 | **7.1** | **10.1** | **33.3** | **49.4** | 14.0 | 86.0 | 77.6 | 22.4 | 47.3 | 52.7 |
|  | **Risk Factors** | | | | | | | | | | | | | | | |
| **Dental treatment** |  |  |  |  |  |  |  |  |  |  |  |  |  |  |  |  |
| No | 16.9 | 34.6 | 36.0 | 12.6 | 33.1 | 66.9 | 14.6 | 12.3 | 34.0 | 39.0 | 14.4 | 85.6 | 79.3 | 20.7 | 49.7 | 50.3 |
| Yes | 15.1 | 39.5 | 27.9 | 17.4 | 25.6 | 74.4 | 14.3 | 15.6 | 32.5 | 37.7 | 12.8 | 87.2 | 73.7 | 26.3 | 61.0 | 39.0 |
| **Orthodontic treatment** |  |  |  |  |  |  |  |  |  |  |  |  |  |  |  |  |
| No | 17.6 | 35.0 | 33.5 | 13.8 | 33.5 | 66.5 | 15.5 | 12.2 | 32.4 | 39.9 | **15.9** | **84.1** | 77.3 | 22.7 | 52.1 | 47.9 |
| Yes | 12.9 | 36.3 | 39.5 | 11.3 | 26.2 | 73.8 | 11.4 | 14.9 | 38.6 | 35.1 | **8.0** | **92.0** | 82.5 | 17.5 | 48.7 | 51.3 |
| **Entubation** |  |  |  |  |  |  |  |  |  |  |  |  |  |  |  |  |
| No | 17.0 | 35.1 | 35.0 | 12.9 | **32.7** | **67.3** | 14.6 | 13.0 | 34.4 | 38.1 | 14.6 | 85.4 | 79.0 | 21.0 | 51.5 | 48.5 |
| Yes | 8.7 | 39.1 | 30.4 | 21.7 | **13.0** | **87.0** | 14.3 | 9.5 | 19.0 | 57.1 | 4.3 | 95.7 | 65.0 | 35.0 | 47.8 | 52.2 |
| **Orthognatic Surgery** |  |  |  |  |  |  |  |  |  |  |  |  |  |  |  |  |
| No | **16.7** | **35.3** | **35.3** | **12.8** | 32.3 | 67.7 | 14.3 | 12.8 | 34.2 | 38.7 | 14.1 | 85.9 | 78.7 | 21.3 | 51.2 | 48.8 |
| Yes | **12.5** | **37.5** | **0** | **50.0** | 12.5 | 87.5 | 33.3 | 16.7 | 0 | 50 | 16.7 | 83.3 | 60.0 | 40.0 | 62.5 | 37.5 |
| **Wisdom teeth removal** |  |  |  |  |  |  |  |  |  |  |  |  |  |  |  |  |
| No | 17.5 | 35.7 | 33.8 | 12.9 | 33.5 | 66.5 | 14.2 | 12.7 | 33.3 | 39.7 | **15.7** | **84.3** | 78.7 | 21.3 | 50.9 | 49.1 |
| Yes | 12.9 | 33.6 | 38.8 | 14.7 | 25.9 | 74.1 | 15.9 | 13.1 | 35.5 | 35.5 | **8.0** | **92.0** | 77.7 | 22.3 | 52.8 | 47.2 |
| **Jaw Trauma** |  |  |  |  |  |  |  |  |  |  |  |  |  |  |  |  |
| No | 17.1 | 34.3 | 35.1 | 13.5 | 32.4 | 67.6 | 15.1 | 12.2 | 34.3 | 38.4 | 14.3 | 85.7 | **79.4** | **20.6** | 52.0 | 48.0 |
| Yes | 9.1 | 51.5 | 30.3 | 9.1 | 24.2 | 75.8 | 6.5 | 22.6 | 25.8 | 45.2 | 12.1 | 87.9 | **63.3** | **36.7** | 40.0 | 60 |
|  | **Other Comorbidities** | | | | | | | | | | | | | | | |
| **Number of other Comorbidities** |  |  |  |  |  |  |  |  |  |  |  |  |  |  |  |  |
| 0 | **21.1** | **38.7** | **28.8** | **11.5** | 32.1 | 67.9 | **20.1** | **15.8** | **35.1** | **29.0** | 12.1 | 87.9 | 78.9 | 21.1 | 52.7 | 47.3 |
| 1 | **12.9** | **34.5** | **38.8** | **13.7** | 36.0 | 64.0 | **9.7** | **14.5** | **33.9** | **41.9** | 13.0 | 87.0 | 81.1 | 18.9 | 50.4 | 49.6 |
| ≥2 | **10.5** | **28.7** | **44.1** | **16.8** | 28.0 | 72.0 | **8.3** | **5.3** | **31.1** | **55.3** | 19.3 | 80.7 | 75.0 | 21.5 | 49.2 | 50.8 |
| **Mental, behavioral or neurodevelopmental disorders** |  |  |  |  |  |  |  |  |  |  |  |  |  |  |  |  |
| No | **17,4** | **38.2** | **31.0** | **13.3** | 31.5 | 68.5 | **17.0** | **15.1** | **34.5** | **33.4** | 13.8 | 86.2 | 78.0 | 22.0 | 51.9 | 48.1 |
| Yes | **14.4** | **26.8** | **45.8** | **13.1** | 33.3 | 66.7 | **8.3** | **6.9** | **31.9** | **52.8** | 15.0 | 85.0 | 79.7 | 21.5 | 49.6 | 50.4 |
| **Diseases of the respiratory system** |  |  |  |  |  |  |  |  |  |  |  |  |  |  |  |  |
| No | 17.4 | 35.0 | 34.7 | 12.9 | 31.5 | 68.5 | 15.6 | 13.2 | 33.8 | 37.4 | 14.6 | 85.4 | 77.7 | 22.3 | 51.2 | 48.8 |
| Yes | 10.4 | 37.3 | 35.8 | 16.4 | 35.8 | 64.2 | 6.7 | 10.0 | 33.3 | 50.0 | 14.1 | 85.9 | 84.5 | 15.5 | 52.6 | 47.4 |
| **Endocrine, nutritional or metabolic diseases** |  |  |  |  |  |  |  |  |  |  |  |  |  |  |  |  |
| No | 17.2 | 36.2 | 34.1 | 12.5 | 32.1 | 67.9 | 12.5 | 13.2 | 33.3 | 38.0 | 13.6 | 86.4 | 79.0 | 21.0 | 50.8 | 49.2 |
| Yes | 11.9 | 27.1 | 40.7 | 20.3 | 30.5 | 69.5 | 5.8 | 9.6 | 38.5 | 46.2 | 19.0 | 81.0 | 73.5 | 26.5 | 56.0 | 44.0 |
| **Diseases of the circulatory system** |  |  |  |  |  |  |  |  |  |  |  |  |  |  |  |  |
| No | 16.6 | 35.2 | 35.0 | 13.3 | 31.7 | 68.3 | 14.7 | 13.0 | 33.7 | 38.6 | **12.8** | **87.2** | 79.5 | 20.5 | 51.9 | 48.1 |
| Yes | 17.3 | 36.5 | 32.7 | 13.5 | 34.6 | 65.4 | 13.0 | 10.9 | 34.8 | 41.3 | **28.0** | **72.0** | 67.4 | 32.6 | 45.5 | 54.5 |
| **Diseases of the musculoskeletal system** |  |  |  |  |  |  |  |  |  |  |  |  |  |  |  |  |
| No | 17.2 | 35.6 | 34.5 | 12.7 | 31.7 | 68.3 | 14.4 | 13.2 | 34.0 | 38.5 | 14.1 | 85.9 | 79.1 | 20.9 | 50.7 | 49.3 |
| Yes | 8.3 | 35.3 | 34.8 | 13.3 | 36.1 | 63.9 | 17.2 | 6.9 | 31.0 | 44.8 | 14.3 | 85.7 | 66.7 | 33.3 | 61.3 | 38.7 |
